# Supplementary material for: Microwave-Assisted Synthesis of 5′-O-methacryloylcytidine Using the Immobilized Lipase Novozym 435
Source: MDPI journal article supplement (doi:10.3390/molecules27134112), 2022-06-26
Supplement: s1 [file s1]

# Microwave-assisted synthesis of 5'-O-methacryloylcytidine using the immobilized lipase Novozym 435

Sany Chea <sup>1,2</sup>, Khac Toan Nguyen <sup>1,3</sup> and Ruben R. Rosencrantz <sup>1,\*</sup>

<sup>1</sup> Fraunhofer Institute of Applied Polymer Research, Biofunctionalized Materials and (Glyco)Biotechnology, Geiselbergstr. 69, 14476 Potsdam

<sup>2</sup> University of Potsdam, Institute of Chemistry, Chair of Polymer Materials and Polymer Technologies, Karl- Liebknecht- Str. 24-25, 14476 Potsdam

<sup>3</sup> Technical University of Berlin, Institute of Chemistry, Str. des 17. Juni 115, 10623 Berlin

\* Correspondence: ruben.rosencrantz@iap.fraunhofer.de; Tel.: +49 331 568 3203

|                                                                                                                                                 |   |
|-------------------------------------------------------------------------------------------------------------------------------------------------|---|
| <b>Figure S1.</b> <sup>1</sup> H NMR of 5'-O-methacryloylcytidine.....                                                                          | 1 |
| <b>Figure S2.</b> <sup>13</sup> C NMR of 5'-O-methacryloylcytidine. ....                                                                        | 2 |
| <b>Figure S3.</b> 2D COSY NMR of 5'-O-methacryloylcytidine.....                                                                                 | 2 |
| <b>Figure S4.</b> 2D HSQC NMR of 5'-O-methacryloylcytidine.....                                                                                 | 3 |
| <b>Table S1.</b> Effect of the substrate choice. Reaction conditions: 12.7 wt% Novozym 435, 95 °C, 1:35 cytidine to substrate molar ratio. .... | 3 |
| <b>Table S2.</b> Effect of enzyme concentration with 1:35 molar ratio vinyl methacrylate.....                                                   | 3 |
| <b>Table S3.</b> Effect of reaction temperature with a vinyl methacrylate molar ratio of 1:35. ....                                             | 4 |
| <b>Table S4.</b> Effect of reaction time with a 1:35 molar ratio of vinyl methacrylate. ....                                                    | 5 |
| <b>Table S5.</b> Effect of molar ratio at a reaction temperature of 95 °C.....                                                                  | 5 |

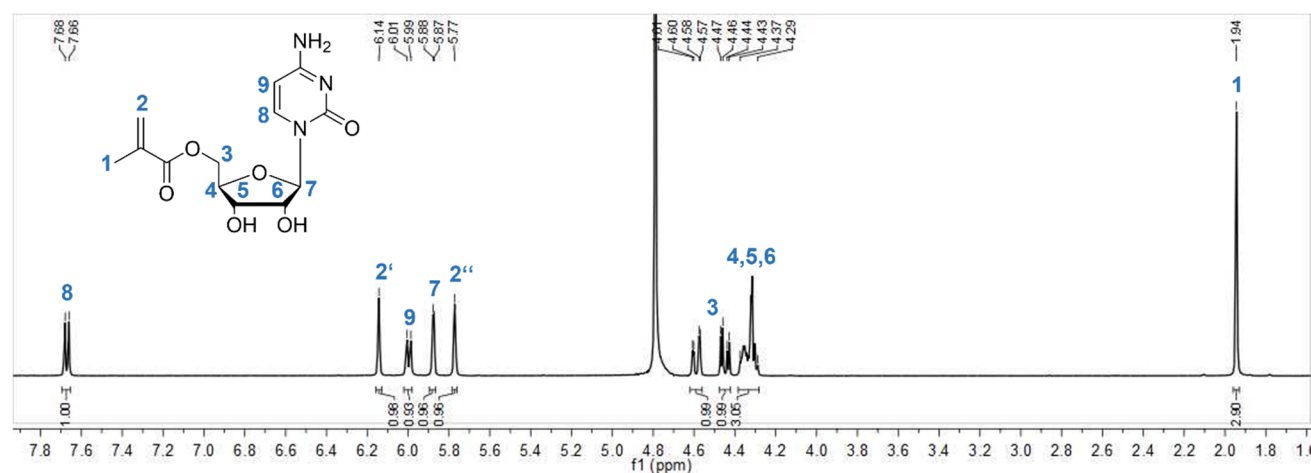

**Figure S1.** <sup>1</sup>H NMR of 5'-O-methacryloylcytidine.

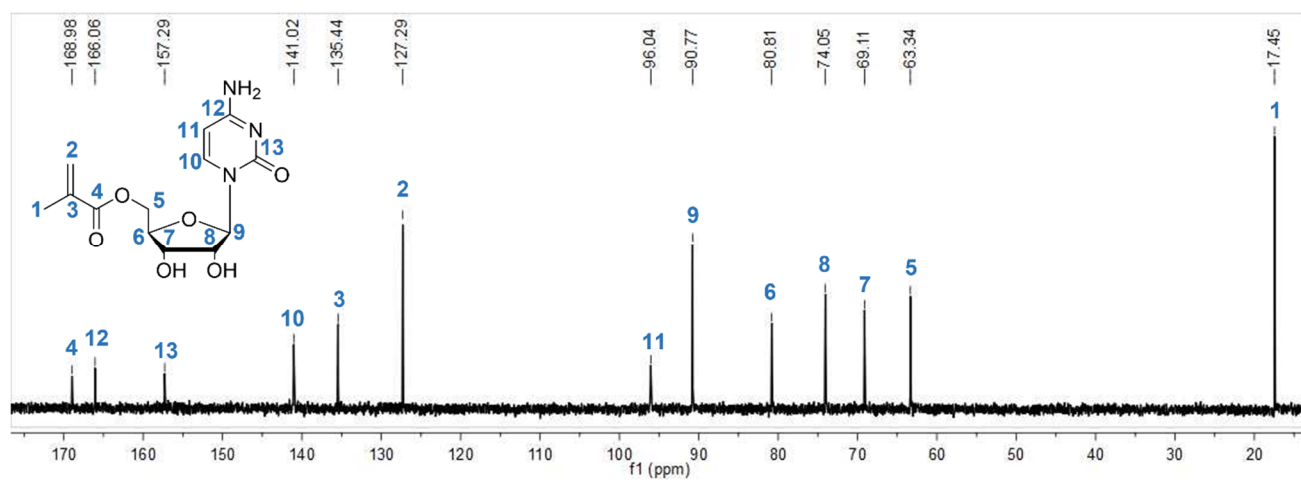

**Figure S2.**  $^{13}\text{C}$  NMR of 5'-O-methacryloylcytidine.

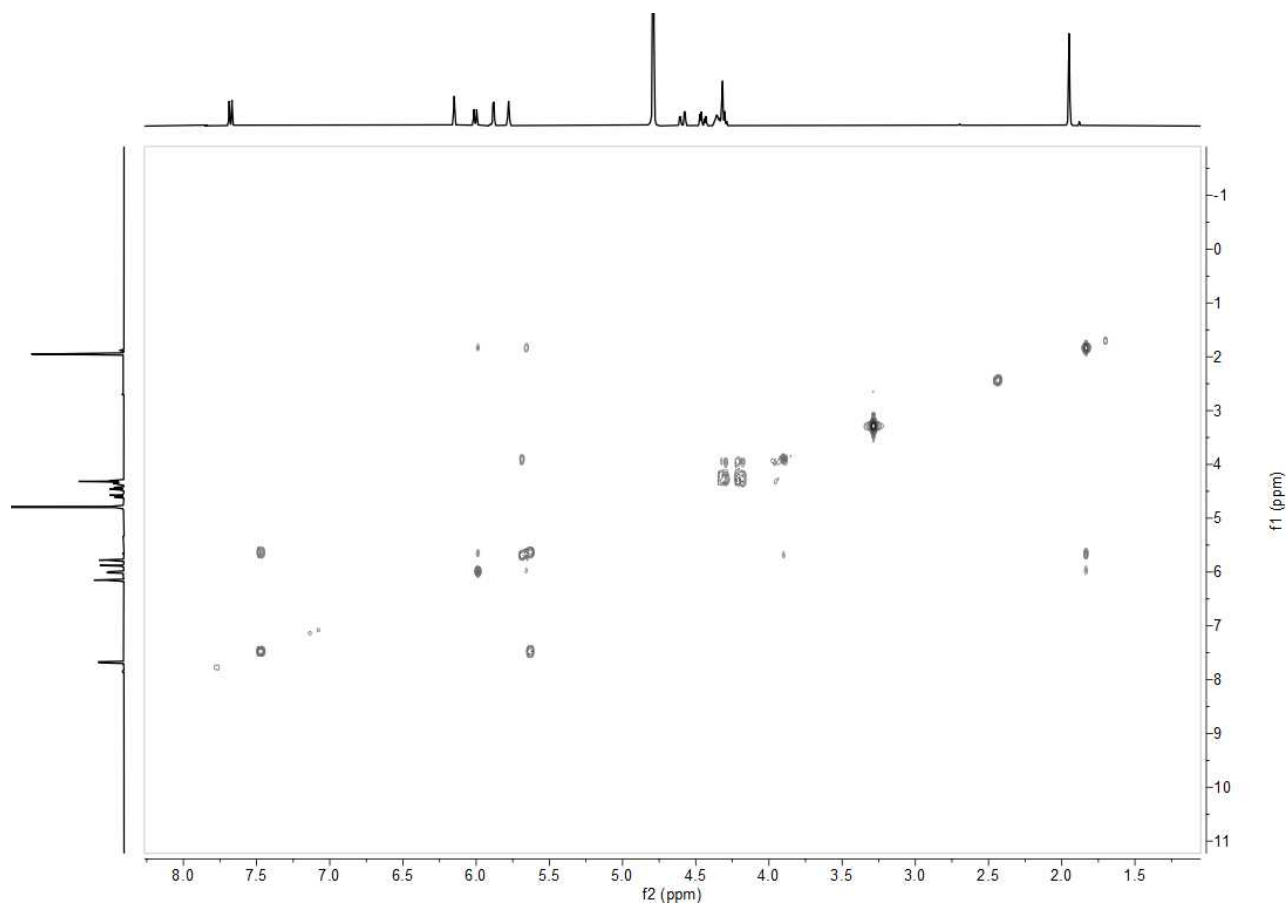

**Figure S3.** 2D COSY NMR of 5'-O-methacryloylcytidine.

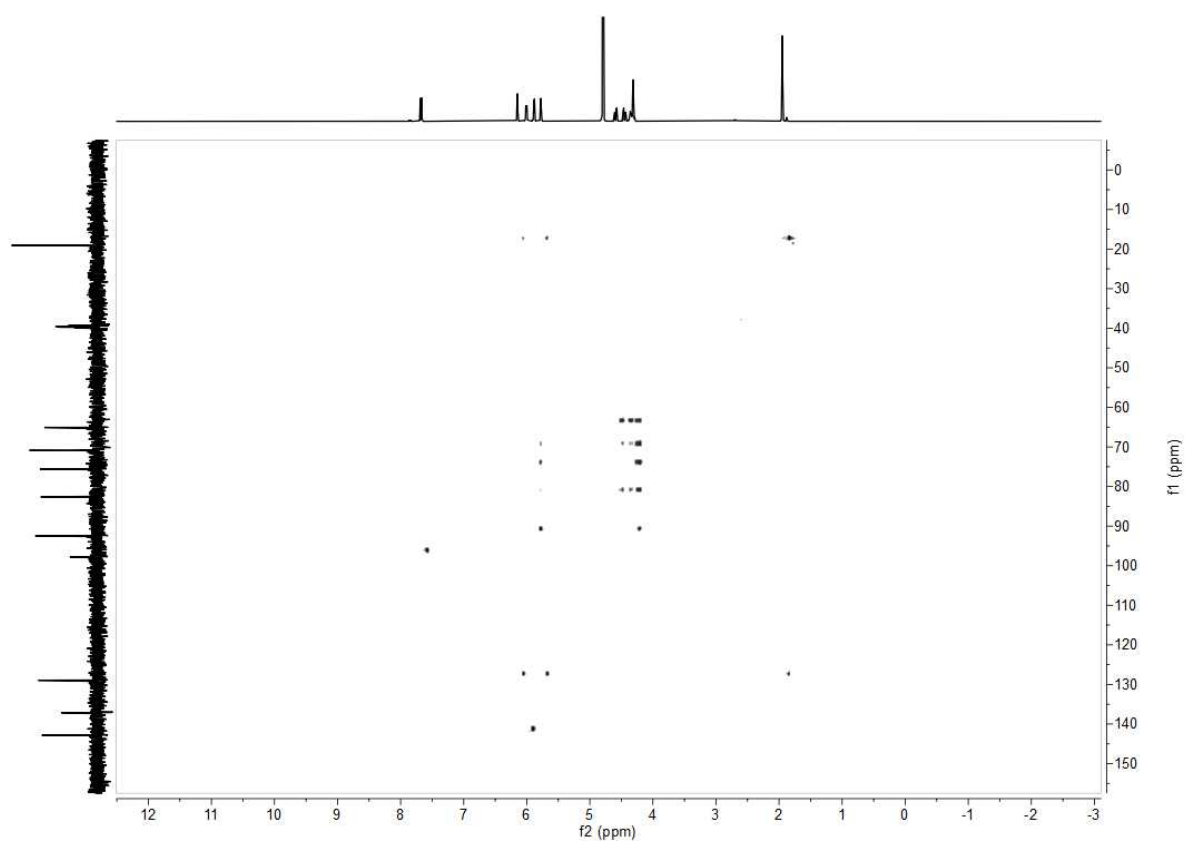

**Figure S4.** 2D HSQC NMR of 5'-O-methacryloylcytidine.

**Table S1.** Effect of the substrate choice. Reaction conditions: 12.7 wt% Novozym 435, 95 °C, 1:35 cytidine to substrate molar ratio.

| Substrate           | Time (min) | Yield (%) |
|---------------------|------------|-----------|
| Methyl methacrylate | 30         | 9,4       |
|                     | 60         | 14,1      |
|                     | 120        | 7,2       |
| Vinyl methacrylate  | 30         | 36,2      |
|                     | 60         | 13,1      |
|                     | 120        | 7,5       |

**Table S2.** Effect of enzyme concentration with 1:35 molar ratio vinyl methacrylate.

| Concentration of lipase (wt%) | Time (min) | Temperature (°C) | Yield (%) |
|-------------------------------|------------|------------------|-----------|
| 5.5                           | 30         | 95               | 7.2       |
|                               |            | 60               | 2.8       |

|      |     |    |      |
|------|-----|----|------|
|      |     | 45 | 2.4  |
|      | 60  | 95 | 7.8  |
|      | 120 | 95 | 4.2  |
| 12.7 | 30  | 95 | 36.2 |
|      |     | 60 | 28.4 |
|      |     | 45 | 11.4 |
|      | 60  | 95 | 13.1 |
|      | 120 | 95 | 7.5  |
| 22.5 | 30  | 95 | 21.2 |
|      | 60  | 95 | 11.0 |
|      | 120 | 95 | 9.9  |

**Table S3.** Effect of reaction temperature with a vinyl methacrylate molar ratio of 1:35.

| Temperature (°C) | Concentration of lipase (wt%) | Time (min) | Yield (%) |
|------------------|-------------------------------|------------|-----------|
| 45               | 5.5                           | 30         | 2.4       |
|                  | 12.7                          | 30         | 11.4      |
|                  |                               | 60         | 6.6       |
|                  |                               | 120        | 9.8       |
| 60               | 5.5                           | 30         | 2.8       |
|                  | 12.7                          | 30         | 28.4      |
|                  |                               | 60         | 19.4      |
|                  |                               | 120        | 9.1       |
| 95               | 5.5                           | 30         | 7.2       |
|                  | 12.7                          | 30         | 36.2      |
|                  |                               | 60         | 13.1      |
|                  |                               | 120        | 7.5       |
| 120              | 12.7                          | 30         | 9.5       |
|                  |                               | 60         | 4.1       |
|                  |                               | 120        | 3.6       |

**Table S4.** Effect of reaction time with a 1:35 molar ratio of vinyl methacrylate.

| <b>Time (min)</b> | <b>Concentration of lipase (wt%)</b> | <b>Reaction temperature (°C)</b> | <b>Yield (%)</b> |
|-------------------|--------------------------------------|----------------------------------|------------------|
| 10                | 12.7                                 | 95                               | 11.6             |
| 20                | 12.7                                 | 95                               | 19.9             |
| 30                | 5.5                                  | 95                               | 7.2              |
|                   | 12.7                                 | 45                               | 11.4             |
|                   |                                      | 60                               | 28.4             |
|                   |                                      | 95                               | 36.2             |
|                   |                                      | 120                              | 9.5              |
|                   | 22.5                                 | 95                               | 21.2             |
| 45                | 12.7                                 | 95                               | 17.2             |
| 60                | 5.5                                  | 95                               | 7.8              |
|                   | 12.7                                 | 45                               | 6.6              |
|                   |                                      | 60                               | 19.4             |
|                   |                                      | 95                               | 13.1             |
|                   |                                      | 120                              | 4.1              |
|                   | 22.5                                 | 95                               | 9.9              |
| 120               | 5.5                                  | 95                               | 4.2              |
|                   | 12.7                                 | 45                               | 9.8              |
|                   |                                      | 60                               | 9.1              |
|                   |                                      | 95                               | 7.5              |
|                   |                                      | 120                              | 3.6              |
|                   | 22.5                                 | 95                               | 7.5              |
| 300               | 12.7                                 | 95                               | 6.4              |

**Table S5.** Effect of molar ratio at a reaction temperature of 95 °C.

| <b>Substrate molar ratio</b> | <b>Enzyme concentration (wt%)</b> | <b>Time (min)</b> | <b>Yield (%)</b> |
|------------------------------|-----------------------------------|-------------------|------------------|
| 1:35                         | 12.7                              | 30                | 36.2             |
|                              |                                   | 60                | 13.1             |
|                              |                                   | 120               | 7.5              |

|      |      |     |      |
|------|------|-----|------|
|      |      | 300 | 6.4  |
| 1:76 | 12.7 | 30  | 7.8  |
|      |      | 60  | 15   |
|      |      | 120 | 12.6 |
|      | 22.5 | 120 | 17.3 |
|      |      | 300 | 4.8  |
